# Supplementary material
Source: publisher figshare collection journal article supplement (https://rs.figshare.com/ndownloader/files/29113520)
Supplement: Supplementary file 1 [file 29113520]

xread
77 37
Hallucigenia_sparsa	0??00?000?00???0010???0????????????0?????????????????????????0??010??????0??0
Ovatiovermis_cribratus	0???0?100?00???0010???0????????????0?0???10??10???0????????0?0?1010????0?0??0
Aysheaia_pedunculata	0??00?100?00???00?????0????????????1?0???????00???0????????0?0?1000????0?0??0
Megadictyon_haikouensis	0??10?100?00???00?????0????????????1?0???????00???0????????0?0??000????0?????
Jianshanopodia_decora	0??10?100?00???00?????0????????????100????????0??????????????0?1000????0????0
Siberion_lenaicus	0???0?100?0????00?????0????????????110???????????????????????0??000??????0???
Kerygmachela_kierkegardi	0??1??100?01000?0?????0????????????110???????00???0????????0?0??0010100??0??1
Pambdelurion_whittingtoni	0??1??100?0?????010???0????????????110???10??00???0????????0?0??0010?0???????
Opabinia_regalis	10?1??100?0111020?????0????????????10?????????0???0????????????00?10200111100
Titanokorys_gainesi	??0???11????????011???11111011111011?10100?1001?10110?311?????0????????1?????
Cambroraster_falcatus	100?0?110?01101101110111110101111101010100?1001?10110?311110?0000?1101?101100
Hurdia_victoria	100?0?110?01101101110111110011000011010100?1001?11110?211110?0000?110??101000
Hurdia_triangulata	100?0?110?0????101110111110111000011010100?1001?11110?211110?0000?110??101?00
Peytoia_nathorsti	1001??110?01101101110011100?0??00?0101000111001011110?21110110000?11111101?00
Stanleycaris_hirpex	??????11????????011100?????????????1?1000111001010110??11?????0??????????????
Schinderhannes_bartelsi	1?0?0?110?01?00101???0?10???0??00??10????110?01010110?211?0??00?0???1????1001
Aegirocassis_benmoulai	10??1011??0???????????111000100000010?0?00?1001?10110?311??0??00??1???11?????
Cordaticaris_striatus	100???11????????01111011111111101111?1?1?0?1001?10110?3111?0?000??1????10????
Pahvantia_hastata	??0???11??????????????11110011101111???????1001?10110?211?10?00????????1?????
Zhenghecaris_shankouensis	??0???????????????????11111101111????????????????????????????????????????????
Laminacaris_chimera	??????11???????????????????????????1?1100??001100?111021[0 1]1010?0??????????????
Ramskoeldia_consimilis	??????11???????????????????????????1?01?1??0110???1110100?010?0???1???1??????
Amplectobelua_symbrachiata	100?0?110??1100?0???1?110001000000010110110011100?10100?0?011000??1?111??1?10
Amplectobelua_stephenensis	??????11???????????????????????????1?110?1001?110?100?100?011?0??????????????
Lyrarapax_unguispinus	10010?110?1110010??1??11000100000??1011010?0111?0?1110200?0??0000?11?111?1?10
Anomalocaris_saron	10010?11??1110010110??1?000100000??1001?1??0000???11?01?0?0100000?11111??1110
Anomalocaris_canadensis	10010?110?11100101101011000100000001001?0100010???11100?0?0100000?112101?1100
Anomalocaris_briggsi	??????11???????????????????????????1?01?11000011?011112[0 1]00010?0??????????????
Tamisiocaris_borealis	??????11???????????????????????????1?01??1000011?01111310?0???0??????????????
Caryosyntrips_serratus	??????11???????????????????????????1?01?0100100???0????????1??0??????????????
Surusicaris_elegans	1?0?11111101100??0?????0???????????1000?00?0000???0????????10?00000????0?????
Isoxys_sp.	1?01??111101100??0????100??10?000??100[0 1]?00?0000???0????????0??0?0?0??????1100
Yawunik_kootenayi	1111111110?11102?0????00???????????10?????????????????????????110?0????110??1
Eoredlichia_intermediata	1111111110?1000210????00???????????10????????????????????????1111?0????110??0
Habelia_optata	11101[0 1]1110?1000210????00???????????10?????????????????????????111?0????110??1
Waptia_fieldensis	1100111111?11002?0????100??1??000??10????????????????????????1110?0????110??1
Chengjiangocaris_kunmingensis	111?111111?1100210????10000100000??10????????????????????????111??0????0????1
;


proc /;
comments 0
;
